# Supplementary material for: Granzyme M expressed by tumor cells promotes chemoresistance and EMT in vitro and metastasis in vivo associated with STAT3 activation
Source: PubMed Central journal article supplement (PMC4467404; doi:10.18632/oncotarget.3461), 2015-02-28
Supplement: oncotarget-06-5818-s001.pdf [file oncotarget-06-5818-s001.pdf]

## Granzyme M expressed by tumor cells promotes chemoresistance and EMT *in vitro* and metastasis *in vivo* associated with STAT3 activation

### Supplementary Material

| Pathway                                | Count | p-Value     | q-Value     | Gene                                                                                                                 |
|----------------------------------------|-------|-------------|-------------|----------------------------------------------------------------------------------------------------------------------|
| Cytokine-cytokine receptor interaction | 18    | 2.07709E-19 | 4.00879E-17 | Kitl; Ccl25; Cxcl1; Ccr1 ;Cxcl5 ;Ccl2 ;Lif; Ccl7; Tnfrsf10b; Il1a; Egfr; Inhbb; Csf2; Cxcl16; Il11; Il6; Fas; Eda2r; |
| Jak-STAT signaling pathway             | 11    | 2.95923E-12 | 1.42783E-10 | Stam2; Stat1; Lif; Socs4; Il13ra2; Pim1; Csf2; Il11; Il6; Pik3r5; Pik3r3                                             |
| VEGF signaling pathway                 | 5     | 3.77328E-06 | 3.73458E-05 | Ptgs2; Hspb1; Mapkapk3;Pik3r5;Pik3r3                                                                                 |
| Cell adhesion molecules (CAMs)         | 4     | 0.001571295 | 0.006034996 | Selp; Itgav; Cd80; Cldn9;                                                                                            |
| Regulation of actin cytoskeleton       | 7     | 5.00242E-06 | 4.5732E-05  | Itgav; Msn; Enah; Egfr; Bdkrb1; Pik3r5; Pik3r3                                                                       |
| Drug metabolism - other enzymes        | 4     | 2.55785E-05 | 0.000189871 | Tk1;Cyp3a13;2210023G05Rik;Ces5                                                                                       |

**Figure S1. Several important pathways that are critical for cancer survival, chemoresistance, angiogenesis and inflammation.**

Supplementary Table S2. Information of patients with colon cancer.

| Variable                                  | No. of patients (%)<br>(n = 90) |
|-------------------------------------------|---------------------------------|
| Age(years) (mean±SD)                      | 63.5±12.5                       |
| Gender                                    |                                 |
| Male                                      | 57 (63.3)                       |
| Female                                    | 33 (36.7)                       |
| Clinical stage                            |                                 |
| I                                         | 17 (18.9)                       |
| II                                        | 23 (25.6)                       |
| III                                       | 35 (38.9)                       |
| IV                                        | 15 (16.7)                       |
| Histologic type                           |                                 |
| Well to moderately differentiated         | 67 (74.4)                       |
| Poorly differentiated to undifferentiated | 23 (25.6)                       |
| Distant Metastasis                        | 15 (16.7)                       |
| Lymphatic Metastasis                      | 46 (51.1)                       |

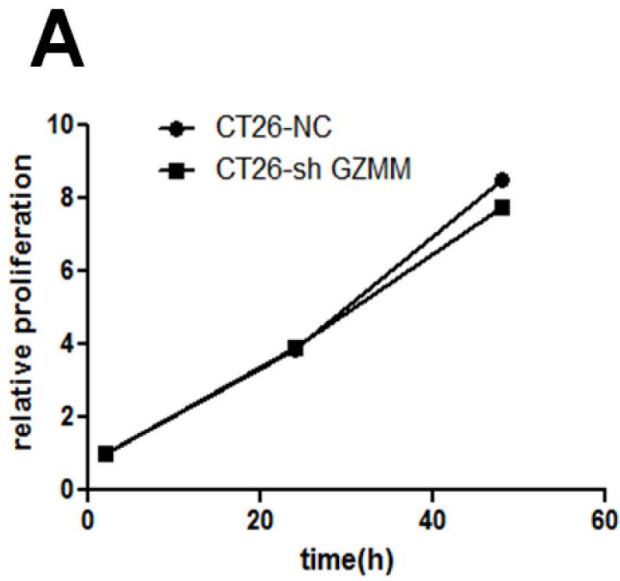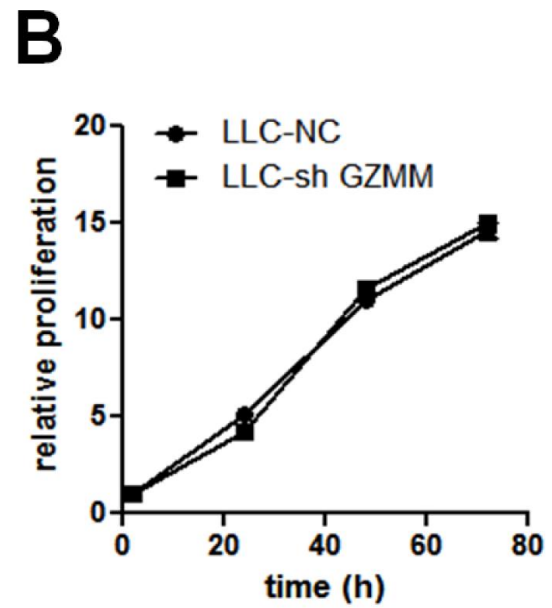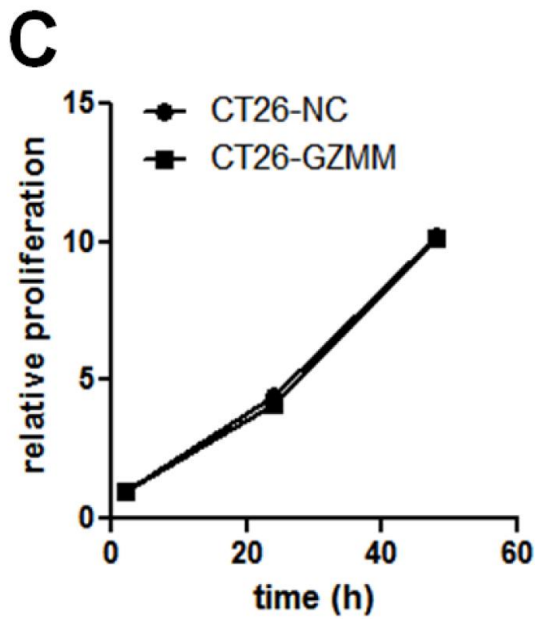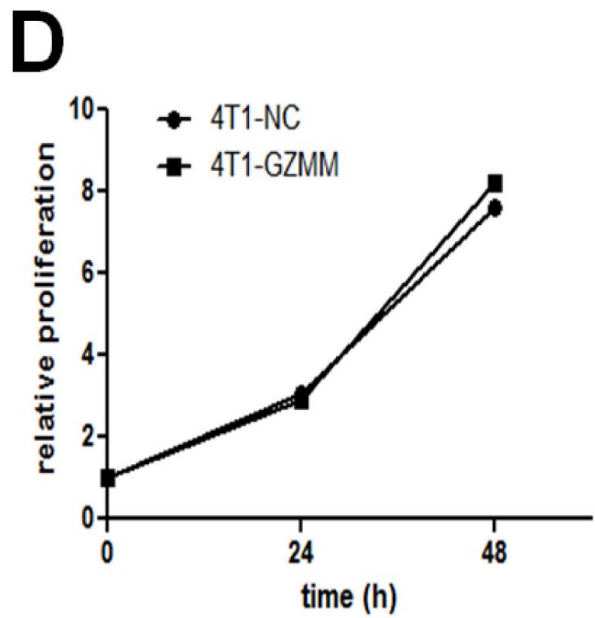

Figure S3. GZMM had almost no significant influence on the proliferation of 4T1, LLC and CT26 cells.
